# Supplementary material for: Rac-mediated actin remodeling and myosin II are involved in KATP channel trafficking in pancreatic β-cells
Source: PubMed Central journal article supplement — Exp Mol Med. 2015 Oct 16;47(10):e190–. doi: 10.1038/emm.2015.72 (PMC4673475; doi:10.1038/emm.2015.72), 2015-10-16
Supplement: emm201572x1.pdf [file emm201572x1.pdf]

## Supplementary information

### Experimental & Molecular Medicine

#### **Rac-mediated actin remodeling and myosin II are involved in $K_{ATP}$ channel trafficking in pancreatic $\beta$ -cells**

Young-Eun Han\*, Ajin Lim\*, Sun-Hyun Park\*, Sunghoe Chang, Suk-Ho Lee, Won-Kyung Ho

Department of Physiology and Biomembrane Plasticity Research Center, Seoul National University College of Medicine, Seoul, Republic of Korea

Correspondence: Professor W-K Ho

Department of Physiology, Seoul National University College of Medicine,

103 Daehak-ro, Jongno-gu, Seoul, 110-799, Republic of Korea

Tel.: +82-2-740-8227; Fax: +82-2-763-9667

E-mail: [wonkyung@snu.ac.kr](mailto:wonkyung@snu.ac.kr)

\* These authors contributed equally to this work.

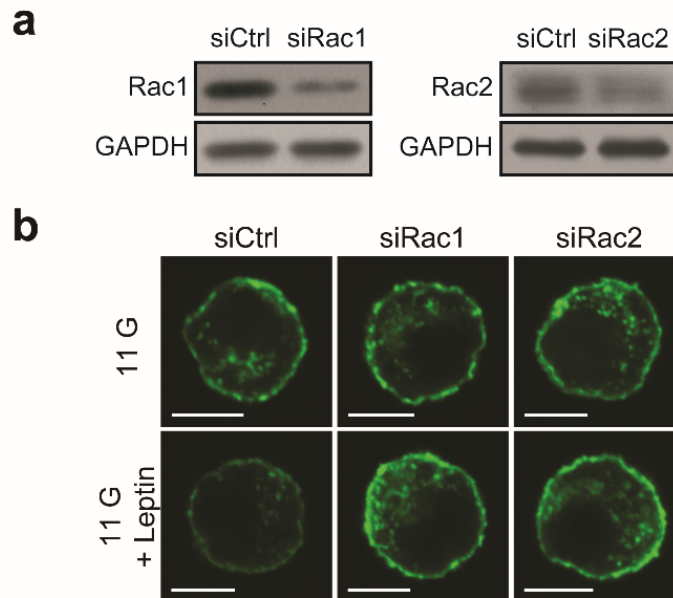

**Supplementary Figure 1** AMPK-induced actin disruption is mediated by Rac. **(a)** Knockdown of endogenous Rac1 or Rac2 in siRac1 or siRac2-transfected INS-1 cells. GAPDH was detected as a loading control. **(b)** Confocal fluorescent images taken by F-actin staining with Alexa 488-phalloidin in siCtrl-, siRac-, or siRac2-transfected INS-1 cells pretreated with or without 10 nM leptin. Scale bar, 5  $\mu$ m.

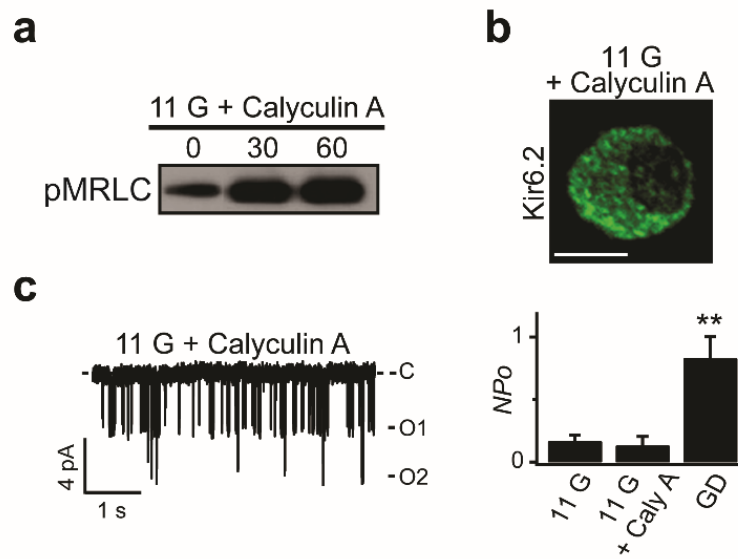

**Supplementary Figure 2** Effects of calyculin A, a MLCP inhibitor, on  $K_{ATP}$  channel trafficking and activity. **(a)** Time dependence of MRLC phosphorylation after stimulation with MLCP inhibitor (calyculin A, 50 nM) **(b)** Confocal fluorescent images obtained from pancreatic  $\beta$ -cells immunolabeled with Kir6.2 antibody in 11G + Calyculin A. Scale bar, 5  $\mu$ m. **(c)** Single  $K_{ATP}$  channel currents obtained from pancreatic  $\beta$ -cells pretreated with calyculin A (Caly A) in 11.1 mM glucose solution. The data are expressed as the mean  $\pm$  S.E.M. (11G,  $n = 14$ ; 11G + Caly A,  $n = 3$ ; GD,  $n = 14$ ). \*\* $P < 0.01$  compared with 11G + Caly A.

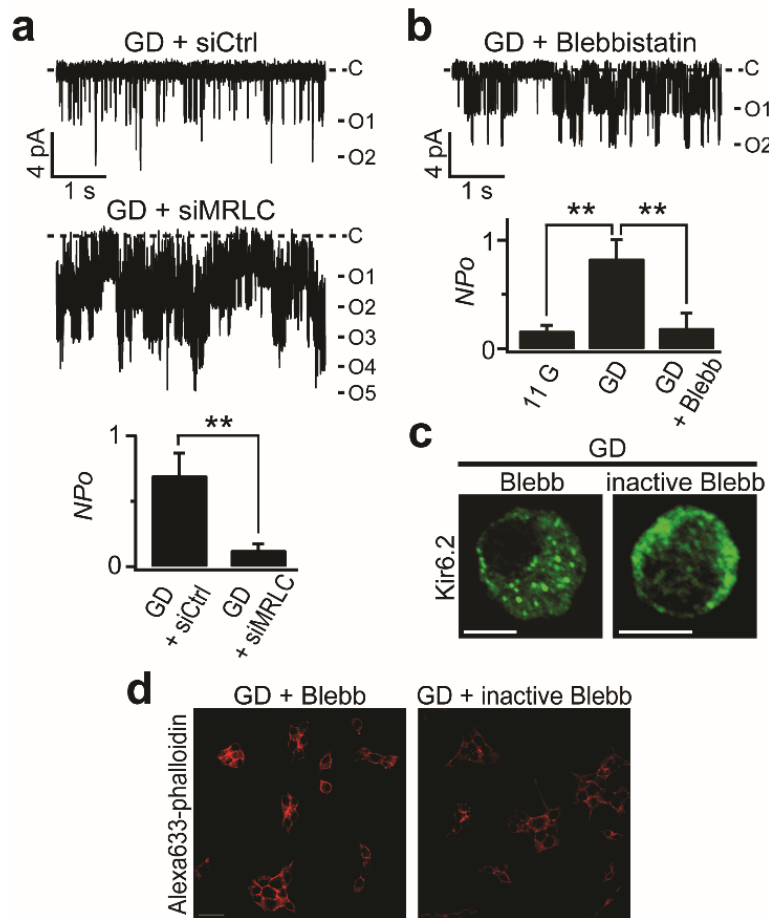

**Supplementary Figure 3** The inhibition of MyoII signaling blocks the AMPK-induced increases in  $K_{ATP}$  channel trafficking and actin remodeling. **(a, b)** The inside-out patches were recorded at  $-60$  mV. C: closed level. O: opened level. The cells after excision were exposed to  $0.25$  mM diazoxide in the presence of  $1\mu\text{M}$  MgATP to open  $K_{ATP}$  channels. **(a)** Representative single  $K_{ATP}$  channel currents of GD-treated INS-1 cells transfected with siCtrl or siMRLC. Mean values for NPo;  $0.70 \pm 0.17$  ( $n = 5$ ) in GD + siCtrl and  $0.12 \pm 0.05$  ( $n = 7$ ) in GD + siMRLC. The data are expressed as the mean  $\pm$  S.E.M. ( $n = 3$ ).  $**P < 0.01$  compared as indicated. **(b)** Representative

single  $K_{ATP}$  channel currents of pancreatic  $\beta$ -cells pretreated with 50  $\mu$ M blebbistatin (Blebb) for 30 min in GD. Mean value for *NPo*;  $0.19 \pm 0.14$  ( $n = 3$ ) in GD + Blebbistatin, and it is compared to 11G or GD. The data are expressed as the mean  $\pm$  S.E.M. ( $n = 3$ ).  $**P < 0.01$  compared as indicated. (c) Representative immunocytochemical images of pancreatic  $\beta$ -cells pretreated with 50  $\mu$ M blebbistatin (Blebb) or 50  $\mu$ M inactive blebbistatin (inactive Blebb) in GD. Scale bar, 5  $\mu$ m. (d) Representative immunofluorescence images for F-actin staining with Alexa 633-phalloidin in INS-1 cells. The cells were pretreated with 50  $\mu$ M blebbistatin (Blebb) or 50  $\mu$ M inactive blebbistatin (inactive blebb) for the 30 min before fixation in GD. Scale bar, 20  $\mu$ m.

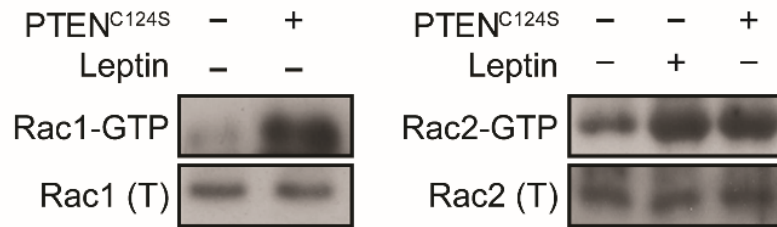

**Supplementary Figure 4** Activation of Rac by PTEN inhibition. Western blot analysis of Rac1 or Rac2 activity in lysates from INS-1 cells transfected with PTEN<sup>WT</sup> or PTEN<sup>C124</sup> construct in the presence or absence of 10 nM leptin.
